# Supplementary material for: The application of a UHPLC system to study the formation of various chemical species by compounds undergoing efficient self-aggregation and to determine the homodimerization constants (KDM) with values in the high range of 106–1010 M−1
Source: Royal Society of Chemistry journal article supplement (doi:10.1039/c7ra05051h), 2017-01-01
Supplement: c7ra05051h1.pdf [file c7ra05051h1.pdf]

## Supporting Information

The application of a UHPLC system to study the formation of various chemical species by compounds undergoing efficient self-aggregation and to determine the homodimerization constants ( $K_{DM}$ ) with values in the high range of  $10^6$ - $10^{10}$   $M^{-1}$

*Magdalena Hetmańska<sup>\*[a]</sup> and Andrzej Maciejewski<sup>\*[a,b]</sup>*

<sup>a</sup> Photochemistry and Spectroscopy Laboratory, Faculty of Chemistry, Adam Mickiewicz University in Poznań, Umultowska 89b, 61-614 Poznań, Poland

<sup>b</sup> Centre for Ultrafast Spectroscopy, Adam Mickiewicz University in Poznań, Umultowska 89, 61-614 Poznań, Poland

**Table S1.** The effect of  $K_{DM}$  value and concentration of the studied compound on the concentration of monomer (M) and dimer (DM).

| $K_{DM}$<br>[ $M^{-1}$ ] | $c$<br>[M]             | $c_{DM}$<br>[M]   | $c_M$<br>[M]         | $c_M/c_{DM}$ | $c_M$<br>[%] | $c_{DM}$<br>[%] |
|--------------------------|------------------------|-------------------|----------------------|--------------|--------------|-----------------|
| <b><math>10^4</math></b> | 2.01                   | 1.0               | 0.01                 | 0.01         | 1.01         | 98.99           |
|                          | $2.0316 \cdot 10^{-1}$ | $1 \cdot 10^{-1}$ | 0.00316              | 0.0316       | 3.06         | 96.94           |
|                          | $2.1 \cdot 10^{-2}$    | $1 \cdot 10^{-2}$ | 0.001                | 0.1          | 9.1          | 90.9            |
|                          | $2.316 \cdot 10^{-3}$  | $1 \cdot 10^{-3}$ | 0.000316             | 0.316        | 24.01        | 75.99           |
|                          | $3 \cdot 10^{-4}$      | $1 \cdot 10^{-4}$ | $1 \cdot 10^{-4}$    | 1.0          | 50.0         | 50.0            |
|                          | $5.16 \cdot 10^{-5}$   | $1 \cdot 10^{-5}$ | $3.16 \cdot 10^{-5}$ | 3.16         | 75.96        | 24.04           |
|                          | $1.2 \cdot 10^{-5}$    | $1 \cdot 10^{-6}$ | $1 \cdot 10^{-5}$    | 10.0         | 90.9         | 9.1             |
|                          | $3.6 \cdot 10^{-6}$    | $1 \cdot 10^{-7}$ | $3.16 \cdot 10^{-6}$ | 31.6         | 96.93        | 3.07            |
|                          | $1.02 \cdot 10^{-6}$   | $1 \cdot 10^{-8}$ | $1 \cdot 10^{-6}$    | 100.0        | 99.0         | 1.0             |

|                       |                        |                   |                      |        |       |       |
|-----------------------|------------------------|-------------------|----------------------|--------|-------|-------|
| <b>10<sup>5</sup></b> | $2.01 \cdot 10^{-1}$   | $1 \cdot 10^{-1}$ | $1 \cdot 10^{-3}$    | 0.01   | 0.99  | 99.01 |
|                       | $2.0316 \cdot 10^{-2}$ | $1 \cdot 10^{-2}$ | $3.16 \cdot 10^{-4}$ | 0.0316 | 3.06  | 96.94 |
|                       | $2.1 \cdot 10^{-3}$    | $1 \cdot 10^{-3}$ | $1 \cdot 10^{-4}$    | 0.1    | 9.1   | 90.09 |
|                       | $2.316 \cdot 10^{-4}$  | $1 \cdot 10^{-4}$ | $3.16 \cdot 10^{-5}$ | 0.316  | 24.01 | 75.99 |
|                       | $3 \cdot 10^{-5}$      | $1 \cdot 10^{-5}$ | $1 \cdot 10^{-5}$    | 1.0    | 50.0  | 50.0  |
|                       | $5.16 \cdot 10^{-6}$   | $1 \cdot 10^{-6}$ | $3.16 \cdot 10^{-6}$ | 3.16   | 75.96 | 24.04 |
|                       | $1.2 \cdot 10^{-6}$    | $1 \cdot 10^{-7}$ | $1 \cdot 10^{-6}$    | 10.0   | 90.9  | 9.1   |
|                       | $3.36 \cdot 10^{-7}$   | $1 \cdot 10^{-8}$ | $3.16 \cdot 10^{-7}$ | 31.6   | 96.93 | 3.07  |
|                       | $1.02 \cdot 10^{-7}$   | $1 \cdot 10^{-9}$ | $1 \cdot 10^{-7}$    | 100.0  | 99.0  | 1.0   |
| <b>10<sup>6</sup></b> | $2.01 \cdot 10^{-2}$   | $1 \cdot 10^{-2}$ | $1 \cdot 10^{-4}$    | 0.01   | 1.01  | 98.99 |
|                       | $2.03 \cdot 10^{-3}$   | $1 \cdot 10^{-3}$ | $3.16 \cdot 10^{-5}$ | 0.0316 | 3.06  | 96.94 |
|                       | $2.1 \cdot 10^{-4}$    | $1 \cdot 10^{-4}$ | $1 \cdot 10^{-5}$    | 0.1    | 9.1   | 90.9  |
|                       | $2.316 \cdot 10^{-5}$  | $1 \cdot 10^{-5}$ | $3.16 \cdot 10^{-6}$ | 0.316  | 24.0  | 76.0  |
|                       | $3.0 \cdot 10^{-6}$    | $1 \cdot 10^{-6}$ | $1 \cdot 10^{-6}$    | 1.0    | 50.0  | 50.0  |
|                       | $5.16 \cdot 10^{-7}$   | $1 \cdot 10^{-7}$ | $3.16 \cdot 10^{-7}$ | 3.16   | 75.96 | 24.04 |
|                       | $1.2 \cdot 10^{-7}$    | $1 \cdot 10^{-8}$ | $1 \cdot 10^{-7}$    | 10.0   | 90.9  | 9.1   |
|                       | $3.36 \cdot 10^{-8}$   | $1 \cdot 10^{-9}$ | $3.16 \cdot 10^{-8}$ | 31.6   | 96.93 | 3.07  |
| <b>10<sup>7</sup></b> | $2.01 \cdot 10^{-3}$   | $1 \cdot 10^{-3}$ | $1 \cdot 10^{-5}$    | 0.01   | 1.01  | 98.99 |
|                       | $2.0316 \cdot 10^{-4}$ | $1 \cdot 10^{-4}$ | $3.16 \cdot 10^{-6}$ | 0.0316 | 3.06  | 96.94 |
|                       | $2.1 \cdot 10^{-5}$    | $1 \cdot 10^{-5}$ | $1 \cdot 10^{-6}$    | 0.1    | 9.1   | 90.9  |

|                       |                        |                    |                       |        |       |       |
|-----------------------|------------------------|--------------------|-----------------------|--------|-------|-------|
|                       | $2.316 \cdot 10^{-6}$  | $1 \cdot 10^{-6}$  | $3.16 \cdot 10^{-7}$  | 0.316  | 24.01 | 75.99 |
|                       | $3.0 \cdot 10^{-7}$    | $1 \cdot 10^{-7}$  | $1 \cdot 10^{-7}$     | 1.0    | 50.0  | 50.0  |
|                       | $5.16 \cdot 10^{-8}$   | $1 \cdot 10^{-8}$  | $3.16 \cdot 10^{-8}$  | 3.16   | 75.96 | 24.04 |
|                       | $1.2 \cdot 10^{-8}$    | $1 \cdot 10^{-9}$  | $1 \cdot 10^{-8}$     | 10.0   | 90.9  | 9.1   |
|                       | $3.36 \cdot 10^{-9}$   | $1 \cdot 10^{-10}$ | $3.16 \cdot 10^{-9}$  | 31.6   | 96.93 | 3.07  |
| <b>10<sup>8</sup></b> | $2.01 \cdot 10^{-4}$   | $1 \cdot 10^{-4}$  | $1 \cdot 10^{-6}$     | 0.01   | 1.01  | 98.99 |
|                       | $2.0317 \cdot 10^{-5}$ | $1 \cdot 10^{-5}$  | $3.16 \cdot 10^{-7}$  | 0.0316 | 3.06  | 96.94 |
|                       | $2.1 \cdot 10^{-6}$    | $1 \cdot 10^{-6}$  | $1 \cdot 10^{-7}$     | 0.1    | 9.1   | 90.9  |
|                       | $2.316 \cdot 10^{-7}$  | $1 \cdot 10^{-7}$  | $3.16 \cdot 10^{-8}$  | 0.316  | 24.01 | 75.99 |
|                       | $3 \cdot 10^{-8}$      | $1 \cdot 10^{-8}$  | $1 \cdot 10^{-8}$     | 1.0    | 50.0  | 50.0  |
|                       | $5.16 \cdot 10^{-8}$   | $1 \cdot 10^{-9}$  | $3.16 \cdot 10^{-9}$  | 3.16   | 75.96 | 24.04 |
|                       | $1.2 \cdot 10^{-9}$    | $1 \cdot 10^{-10}$ | $1 \cdot 10^{-9}$     | 10.0   | 90.0  | 10.0  |
| <b>10<sup>9</sup></b> | $2.01 \cdot 10^{-5}$   | $1 \cdot 10^{-5}$  | $1 \cdot 10^{-7}$     | 0.01   | 1.01  | 98.99 |
|                       | $2.03 \cdot 10^{-6}$   | $1 \cdot 10^{-6}$  | $3.16 \cdot 10^{-8}$  | 0.03   | 3.06  | 96.94 |
|                       | $2.1 \cdot 10^{-7}$    | $1 \cdot 10^{-7}$  | $1 \cdot 10^{-8}$     | 0.1    | 9.1   | 90.9  |
|                       | $2.316 \cdot 10^{-8}$  | $1 \cdot 10^{-8}$  | $3.16 \cdot 10^{-9}$  | 0.3    | 23.08 | 76.92 |
|                       | $3 \cdot 10^{-9}$      | $1 \cdot 10^{-9}$  | $1 \cdot 10^{-9}$     | 1.0    | 50.0  | 50.0  |
|                       | $5.16 \cdot 10^{-10}$  | $1 \cdot 10^{-10}$ | $3.16 \cdot 10^{-10}$ | 3.16   | 75.96 | 24.04 |
|                       | $2.01 \cdot 10^{-6}$   | $1 \cdot 10^{-6}$  | $1 \cdot 10^{-8}$     | 0.01   | 1.01  | 98.99 |

|                        |                         |                     |                        |        |       |       |
|------------------------|-------------------------|---------------------|------------------------|--------|-------|-------|
| <b>10<sup>10</sup></b> |                         |                     |                        |        |       |       |
|                        | 2.0317·10 <sup>-7</sup> | 1·10 <sup>-7</sup>  | 3.16·10 <sup>-9</sup>  | 0.0316 | 3.06  | 96.94 |
|                        | 2.1·10 <sup>-8</sup>    | 1·10 <sup>-8</sup>  | 1·10 <sup>-9</sup>     | 0.1    | 9.1   | 90.9  |
|                        | 2.316·10 <sup>-9</sup>  | 1·10 <sup>-9</sup>  | 3.16·10 <sup>-10</sup> | 0.316  | 24.01 | 75.99 |
|                        | 3·10 <sup>-10</sup>     | 1·10 <sup>-10</sup> | 1·10 <sup>-10</sup>    | 1.0    | 50.0  | 50.0  |
|                        | 5.16·10 <sup>-11</sup>  | 1·10 <sup>-11</sup> | 3.16·10 <sup>-11</sup> | 3.16   | 75.96 | 24.04 |

**Table S2.** The dependence of the monomer and dimer concentration on  $K_{DM}$  (in the range from  $1 \times 10^5$  to  $1 \times 10^{10} \text{ M}^{-1}$ ), calculated for concentrations of C120 in ACN investigated in this work.

| $c_{C120}$<br>[M]          | $c$<br>[M]                       | $K_{DM}=1 \times 10^5$<br>[M <sup>-1</sup> ] | $K_{DM}=1 \times 10^6$<br>[M <sup>-1</sup> ] | $K_{DM}=1 \times 10^7$<br>[M <sup>-1</sup> ] | $K_{DM}=1 \times 10^8$<br>[M <sup>-1</sup> ] | $K_{DM}=1 \times 10^9$<br>[M <sup>-1</sup> ] | $K_{DM}=1 \times 10^{10}$<br>[M <sup>-1</sup> ] |
|----------------------------|----------------------------------|----------------------------------------------|----------------------------------------------|----------------------------------------------|----------------------------------------------|----------------------------------------------|-------------------------------------------------|
| <b>1.9x10<sup>-8</sup></b> | $c_{DM}$<br>(x10 <sup>-8</sup> ) | 0.0035                                       | 0.034                                        | 0.216                                        | 0.572                                        | 0.81                                         | 0.902                                           |
|                            | $c_M$<br>(x10 <sup>-8</sup> )    | 1.87                                         | 1.844                                        | 1.47                                         | 0.756                                        | 0.285                                        | 0.095                                           |
|                            | $c_M/c_{DM}$                     | 534.3                                        | 54.24                                        | 6.81                                         | 1.32                                         | 0.35                                         | 0.105                                           |
| <b>9.3x10<sup>-8</sup></b> | $c_{DM}$<br>(x10 <sup>-8</sup> ) | 0.0835                                       | 0.644                                        | 2.27                                         | 3.7                                          | 4.32                                         | 4.54                                            |
|                            | $c_M$<br>(x10 <sup>-8</sup> )    | 9.14                                         | 8.02                                         | 4.76                                         | 1.92                                         | 0.657                                        | 0.213                                           |
|                            | $c_M/c_{DM}$                     | 109.4                                        | 12.45                                        | 2.1                                          | 0.52                                         | 0.15                                         | 0.047                                           |
|                            | $c_{DM}$<br>(x10 <sup>-7</sup> ) | 0.86                                         | 2.85                                         | 4.44                                         | 5.15                                         | 5.4                                          | 5.46                                            |

|  |                               |       |      |       |       |        |        |
|--|-------------------------------|-------|------|-------|-------|--------|--------|
|  | $c_M$<br>( $\times 10^{-7}$ ) | 9.27  | 5.34 | 2.107 | 0.718 | 0.23   | 0.074  |
|  | $c_M/c_{DM}$                  | 10.78 | 1.87 | 0.475 | 0.139 | 0.0426 | 0.0135 |

**Table S3.** The effect of C120 concentration on the percentage of monomer (M) and trimer (TM) for trimerization constant  $K_{TM} = 1 \times 10^{17} \text{ M}^{-2}$ .

| $c_{C120}$<br>[M]    | $c_M$<br>[%]<br>cal | $c_{TM}$<br>[%]<br>cal | $c_M/c_{TM}$<br>cal | $c_M/c_{DM}$<br>[a]<br>exp |
|----------------------|---------------------|------------------------|---------------------|----------------------------|
| $1.1 \times 10^{-6}$ | 4.1                 | 95.9                   | 0.04                | 0.04                       |
| $9.3 \times 10^{-8}$ | 18.7                | 81.3                   | 0.23                | 0.12                       |
| $1.9 \times 10^{-8}$ | 42.4                | 57.6                   | 0.74                | 0.35                       |

[a] – the values taken from Table 5

**Table S4.** The dependence of the dimer concentration on  $K_{DM}$  (in the range from  $0.5 \times 10^9$  to  $3.0 \times 10^9 \text{ M}^{-1}$ ), calculated for concentrations of C120 in ACN investigated in this work.

| $c_{C120}$ [M]        | $K_{DM}$ [ $\text{M}^{-1}$ ] |                        |                        |                        |                        |                        |
|-----------------------|------------------------------|------------------------|------------------------|------------------------|------------------------|------------------------|
|                       | $0.5 \times 10^9$            | $1.0 \times 10^9$      | $1.5 \times 10^9$      | $2.0 \times 10^9$      | $2.5 \times 10^9$      | $3.0 \times 10^9$      |
|                       | $c_{DM}$ [M]                 |                        |                        |                        |                        |                        |
| $1.08 \times 10^{-6}$ | $0.523 \times 10^{-6}$       | $0.528 \times 10^{-6}$ | $0.531 \times 10^{-6}$ | $0.527 \times 10^{-6}$ | $0.533 \times 10^{-6}$ | $0.534 \times 10^{-6}$ |
| $9.34 \times 10^{-8}$ | $4.21 \times 10^{-8}$        | $4.34 \times 10^{-8}$  | $4.40 \times 10^{-8}$  | $4.435 \times 10^{-8}$ | $4.46 \times 10^{-8}$  | $4.477 \times 10^{-8}$ |
| $1.88 \times 10^{-8}$ | $0.747 \times 10^{-8}$       | $0.8 \times 10^{-8}$   | $0.823 \times 10^{-8}$ | $0.838 \times 10^{-8}$ | $0.848 \times 10^{-8}$ | $0.856 \times 10^{-8}$ |

**Table S5.** The dependence of the dimer concentration on  $K_{DM}$  (in the range from  $3.0 \times 10^9$  to  $11.0 \times 10^9 \text{ M}^{-1}$ ), calculated for concentrations of C120 in 1-chlorobutane investigated in this work.

| $c_{C120} [\text{M}]$ | $K_{DM} [\text{M}^{-1}]$ |                        |                        |                        |                        |
|-----------------------|--------------------------|------------------------|------------------------|------------------------|------------------------|
|                       | $3.0 \times 10^9$        | $5.0 \times 10^9$      | $7.0 \times 10^9$      | $9.0 \times 10^9$      | $11.0 \times 10^9$     |
|                       | $c_{DM} [\text{M}]$      |                        |                        |                        |                        |
| $6.8 \times 10^{-9}$  | $2.91 \times 10^{-9}$    | $3.01 \times 10^{-9}$  | $3.07 \times 10^{-9}$  | $3.107 \times 10^{-9}$ | $3.133 \times 10^{-9}$ |
| $3.4 \times 10^{-8}$  | $1.59 \times 10^{-8}$    | $1.61 \times 10^{-8}$  | $1.625 \times 10^{-8}$ | $1.63 \times 10^{-8}$  | $3.164 \times 10^{-8}$ |
| $8.5 \times 10^{-7}$  | $4.189 \times 10^{-7}$   | $4.205 \times 10^{-7}$ | $4.210 \times 10^{-7}$ | $4.217 \times 10^{-7}$ | $4.221 \times 10^{-7}$ |

**Table S6.** Relative concentrations of the dimer  $c_{DM}(\text{rel})$  depending on  $K_{DM}$  value (in the range from  $3.0 \times 10^9$  to  $11.0 \times 10^9 \text{ M}^{-1}$ ) calculated for concentrations of C120 in 1-chlorobutane investigated in this work.

| $c_{C120} [\text{M}]$ | $c_{C120}(\text{rel})$ | $K_{DM} [\text{M}^{-1}]$ |                   |                   |                   |                    |
|-----------------------|------------------------|--------------------------|-------------------|-------------------|-------------------|--------------------|
|                       |                        | $3.0 \times 10^9$        | $5.0 \times 10^9$ | $7.0 \times 10^9$ | $9.0 \times 10^9$ | $11.0 \times 10^9$ |
|                       |                        | $c_{DM}(\text{rel})$     |                   |                   |                   |                    |
| $6.8 \times 10^{-9}$  | 1.0                    | 1.0                      | 1.0               | 1.0               | 1.0               | 1.0                |
| $3.4 \times 10^{-8}$  | 5.0                    | 5.45                     | 5.35              | 5.29              | 5.25              | 5.23               |
| $8.5 \times 10^{-7}$  | 125                    | 144.1                    | 139.7             | 137.1             | 135.7             | 134.7              |

**Table S7.** Absorbance values at peak maximum for monomer and dimer, calculated for selected concentrations of the studied compound for which  $K_{DM} = 1 \cdot 10^7 \text{ M}^{-1}$

| $c$<br>[M]           | $A^{\lambda=300}$ | $A^{\lambda=340}$ | $c_M$<br>[M]          | $c_{DM}$<br>[M]       | $c_M/c_{DM}$ | $A^{\lambda=300}/A^{\lambda=340}$ | S/N<br>[a] | S/N<br>[b] |
|----------------------|-------------------|-------------------|-----------------------|-----------------------|--------------|-----------------------------------|------------|------------|
| $2.1 \times 10^{-6}$ | 0.0116            | 0.0734            | $0.3 \times 10^{-6}$  | $0.9 \times 10^{-6}$  | 0.34         | 0.16                              | 610        | 3670       |
| $2.0 \times 10^{-7}$ | 0.0030            | 0.0049            | $0.77 \times 10^{-7}$ | $0.6 \times 10^{-7}$  | 1.29         | 0.61                              | 155        | 245        |
| $1.9 \times 10^{-8}$ | 0.00057           | 0.00018           | $1.47 \times 10^{-8}$ | $0.22 \times 10^{-8}$ | 6.72         | 3.17                              | 30         | 9          |

assumed values:  $\epsilon_M^{300} = 15\,500 \text{ M}^{-1}\text{cm}^{-1}$  (like for the monomer C120) and  $\epsilon_{DM}^{340} = 32\,600 \text{ M}^{-1}\text{cm}^{-1}$  (like for the dimer C120),  $l = 2.5 \text{ cm}$ , like in the measurements for C120 in ACN carried out using the UHPLC-PDA-FL system; [a] for  $A^{\lambda=300}$ ; [b] for  $A^{\lambda=340}$ ; absorbance measurement error  $\Delta A = \pm 2 \times 10^{-5}$

**Table S8.** Absorbance values at peak maximum for monomer and dimer, calculated for selected concentrations of the studied compound for which  $K_{DM} = 1 \cdot 10^8 \text{ M}^{-1}$ .

| <b>c</b><br>[M]      | <b>A<sup>λ=300</sup></b> | <b>A<sup>λ=340</sup></b> | <b>c<sub>M</sub></b><br>[M] | <b>c<sub>DM</sub></b><br>[M] | <b>c<sub>M</sub>/c<sub>DM</sub></b> | <b>A<sup>λ=300</sup>/<br/>A<sup>λ=340</sup></b> | <b>S/N</b><br>[a] | <b>S/N</b><br>[b] |
|----------------------|--------------------------|--------------------------|-----------------------------|------------------------------|-------------------------------------|-------------------------------------------------|-------------------|-------------------|
| 2.1x10 <sup>-6</sup> | 0.0039                   | 0.082                    | 1x10 <sup>-7</sup>          | 1x10 <sup>-6</sup>           | 0.11                                | 0.05                                            | 195               | 4100              |
| 1.9x10 <sup>-7</sup> | 0.0011                   | 0.0069                   | 0.29x10 <sup>-7</sup>       | 0.85x10 <sup>-7</sup>        | 0.34                                | 0.16                                            | 55                | 345               |
| 1.9x10 <sup>-8</sup> | 0.00029                  | 0.00047                  | 0.76x10 <sup>-8</sup>       | 0.572x10 <sup>-8</sup>       | 1.31                                | 0.62                                            | 14.5              | 23.5              |

assumed values:  $\epsilon_M^{300}=15\ 500 \text{ M}^{-1}\text{cm}^{-1}$  (like for the monomer C120) and  $\epsilon_{DM}^{340}=32\ 600 \text{ M}^{-1}\text{cm}^{-1}$  (like for the dimer C120),  $l=2.5 \text{ cm}$ , like in the measurements for C120 in ACN carried out using the UHPLC-PDA-FL system; [a] for  $A_M^{\lambda=300}$ ; [b] for  $A_{DM}^{\lambda=340}$ ; absorbance measurement error  $\Delta A = \pm 2 \times 10^{-5}$ . Calculations of  $A^{\lambda=300}$  and  $A^{\lambda=340}$  presented in Tables S4 and S5 were performed for identical or very similar concentrations as those studied for C120 in ACN. The same shape and width of chromatographic peaks of M and DM were assumed as those obtained using the UHPLC-PDA-FL system for C120 in ACN and the same value of  $\epsilon_M^{300}=15\ 500 \text{ M}^{-1}\text{cm}^{-1}$  as that for M and  $\epsilon_{DM}^{340}=32\ 600 \text{ M}^{-1}\text{cm}^{-1}$  that for DM of the studied C120 in ACN. Due to such an approach, the calculated values of  $A^{\lambda=300}$  and  $A^{\lambda=340}$ , as well as the values of the ratio  $S/N = A^{\lambda=300}/\Delta A$  for M and the values of the ratio  $S/N = A^{\lambda=340}/\Delta A$  for DM can be directly compared with experimental values of  $A^{\lambda=300}$  and  $A^{\lambda=340}$ , obtained for C120 in ACN, for which  $K_{DM}=1.5 \times 10^9 \text{ M}^{-1}$ , see Table 1 and Table 5 in the paper.

**Table S9.** Comparison of dimer emission intensity for injected samples of C120 ( $c = 3 \times 10^{-8} \text{ M}$ ) in ACN, with injection volumes of 3  $\mu\text{l}$  and 10  $\mu\text{l}$  (see Fig. S3).

| <b>λ<sub>em</sub></b> | <b>P<sub>DM</sub></b> |              | <b>P<sub>DM</sub> (V=10μl)/P<sub>DM</sub> (V=3μl)</b> |
|-----------------------|-----------------------|--------------|-------------------------------------------------------|
|                       | <b>V=10μl</b>         | <b>V=3μl</b> |                                                       |
| 395 nm                | 93490                 | 27880        | 3.35                                                  |
| 400 nm                | 114630                | 34930        | 3.28                                                  |
| 405 nm                | 131620                | 40140        | 3.28                                                  |
| 410 nm                | 145720                | 44682        | 3.26                                                  |

$\lambda_{ex} = 250 \text{ nm}$

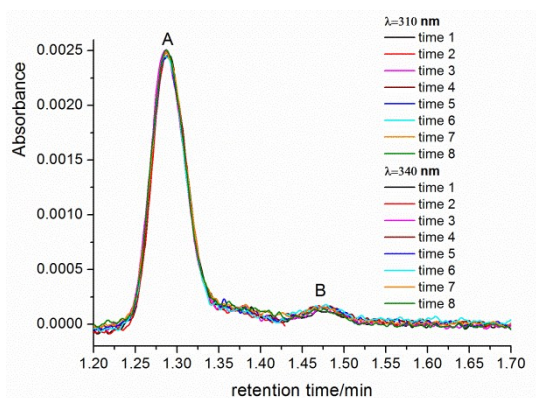

**Figure S1.** Experimental absorption chromatograms of coumarin-120 (C120) in ACN at the dye concentration of  $9.3 \times 10^{-8}$  M measured at 340 nm (1.20 – 1.43 min) and at 310 nm (1.43 – 1.70 min), repeated several times (flow rate:  $0.25 \text{ ml min}^{-1}$ ).

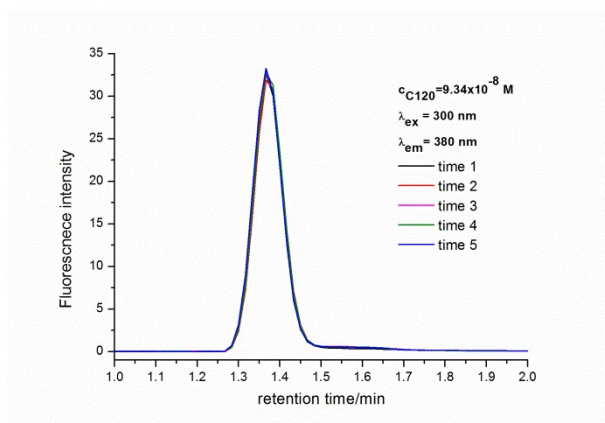

**Figure S2.** Experimental emission chromatograms of coumarin-120 (C120) in ACN at the dye concentration of  $9.3 \times 10^{-8}$  M (flow rate:  $0.25 \text{ ml min}^{-1}$ ).

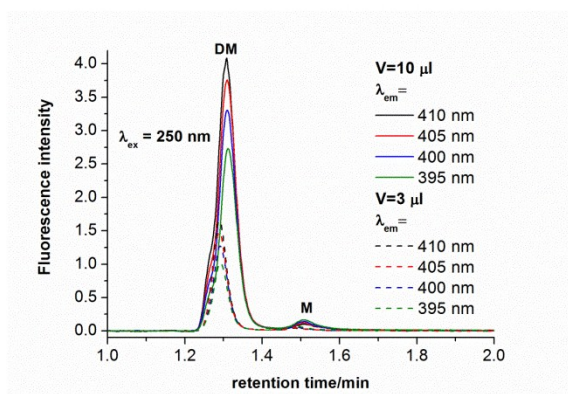

**Figure S3.** Emission chromatograms of C120 ( $c = 3 \times 10^{-8}$  M) in ACN, for injected samples with volumes of  $3 \mu\text{l}$  and  $10 \mu\text{l}$ , (see Tab. S9).
